# Supplementary material for: Vitamin D3 Prevents the Deleterious Effects of Testicular Torsion on Testis by Targeting miRNA-145 and ADAM17: In Silico and In Vivo Study
Source: MDPI journal article supplement (doi:10.3390/ph14121222), 2021-11-25

**Table S1.** The 2D and 3D molecular docking interactions of the docked vitamin D3 with ADAM17 binding site.

| PDB  | 2D interactions                                                                                                                                                                                                                                                                                                                                                                                                                                                                                                                                                                                                                               | 3D interactions |
|------|-----------------------------------------------------------------------------------------------------------------------------------------------------------------------------------------------------------------------------------------------------------------------------------------------------------------------------------------------------------------------------------------------------------------------------------------------------------------------------------------------------------------------------------------------------------------------------------------------------------------------------------------------|-----------------|
| 2ddf | <p>             polar<br/>             acidic<br/>             basic<br/>             greasy<br/>             proximity<br/>             contour           </p> <p>             sidechain acceptor<br/>             sidechain donor<br/>             backbone acceptor<br/>             backbone donor<br/>             ligand exposure           </p> <p>             solvent residue<br/>             metal complex<br/>             solvent contact<br/>             metal/ion contact<br/>             receptor exposure           </p> <p>             arene-arene<br/>             arene-H<br/>             arene-cation           </p> |                 |
| 3l0v | <p>             polar<br/>             acidic<br/>             basic<br/>             greasy<br/>             proximity<br/>             contour           </p> <p>             sidechain acceptor<br/>             sidechain donor<br/>             backbone acceptor<br/>             backbone donor<br/>             ligand exposure           </p> <p>             solvent residue<br/>             metal complex<br/>             solvent contact<br/>             metal/ion contact<br/>             receptor exposure           </p> <p>             arene-arene<br/>             arene-H<br/>             arene-cation           </p> |                 |

3ewl

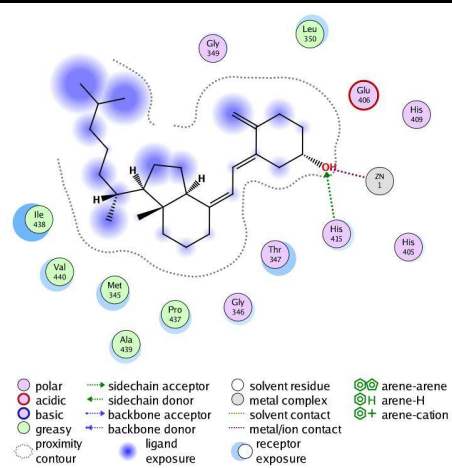

3kmc

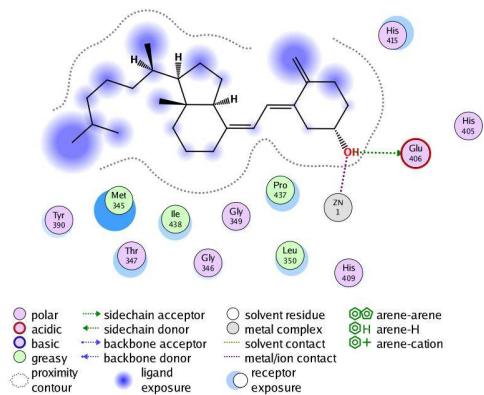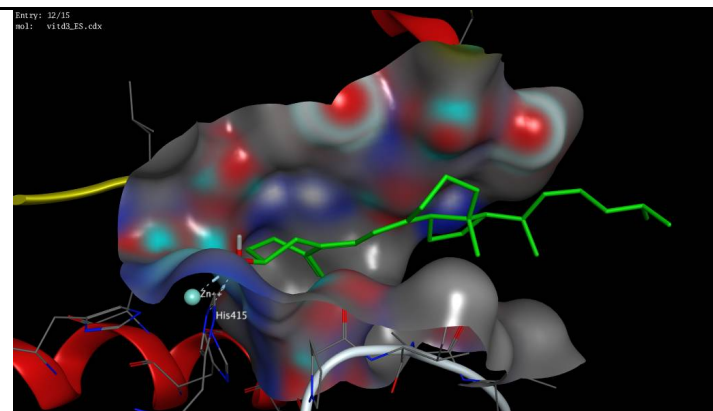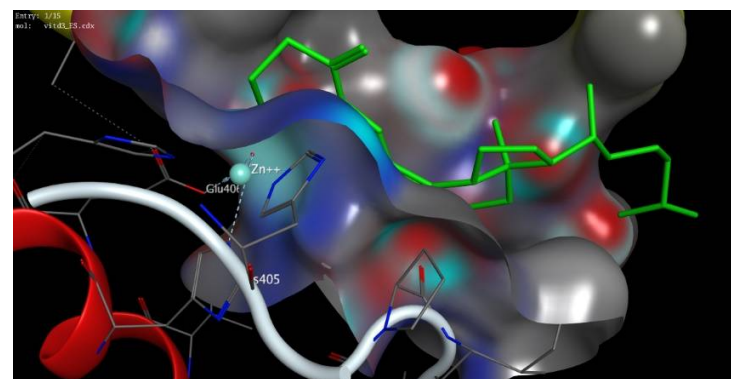

3kme

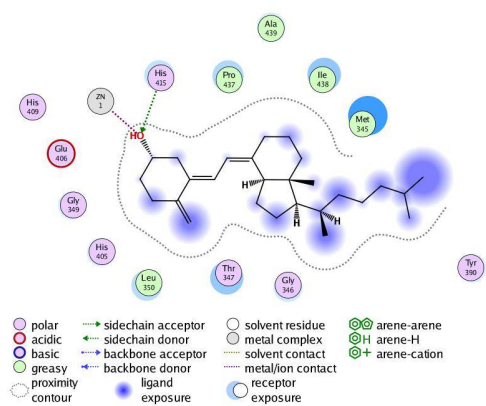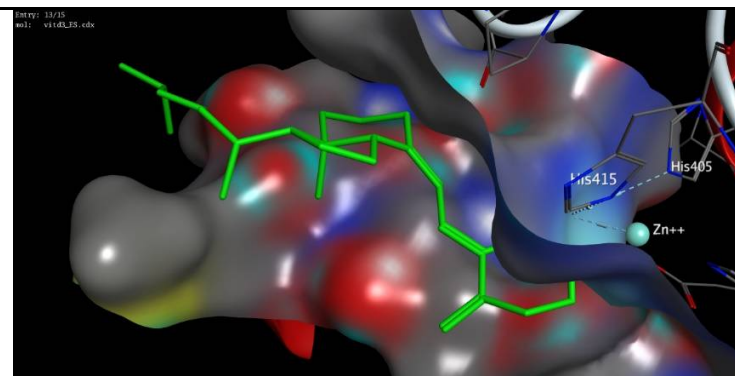

3le9

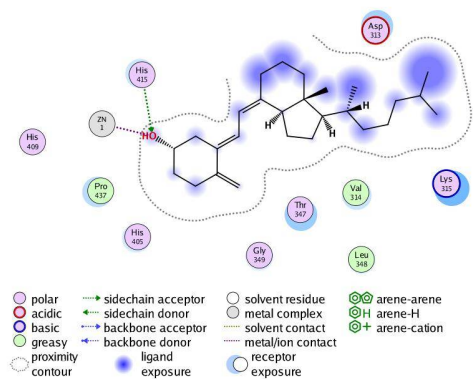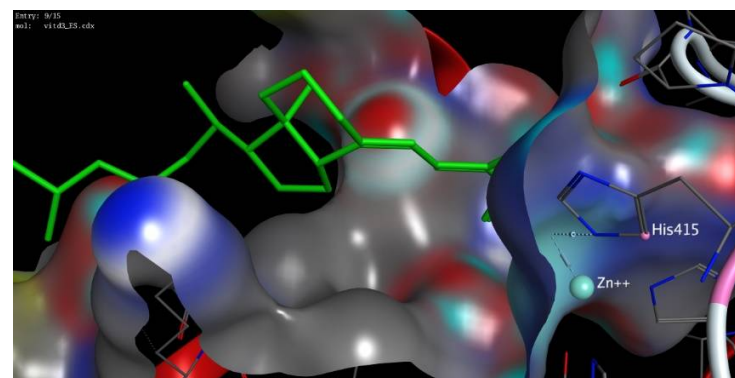

3o64

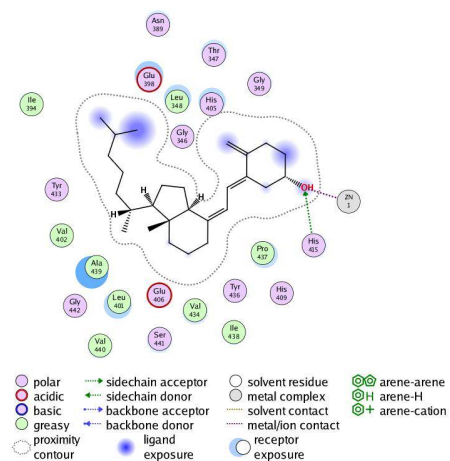

2i47

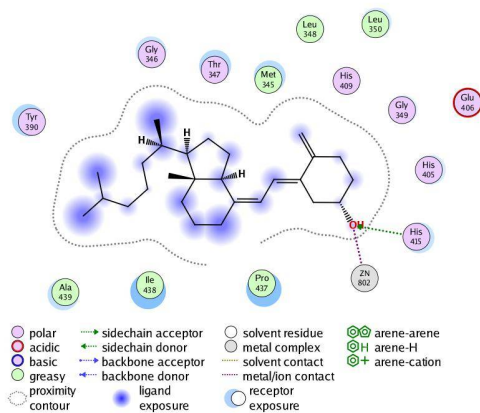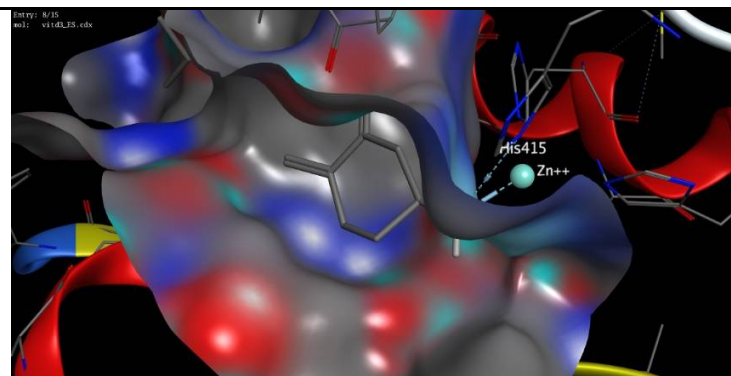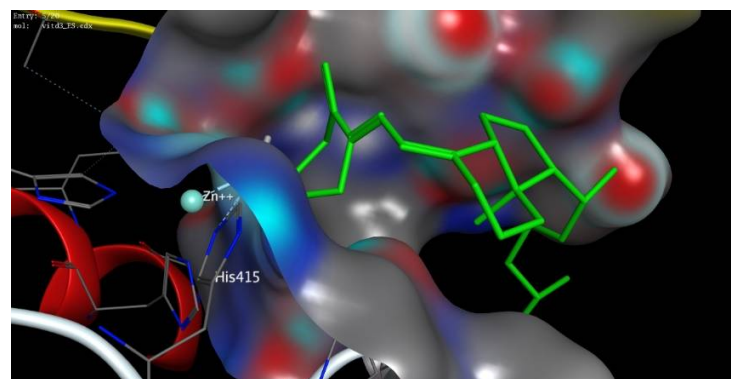



3e8r

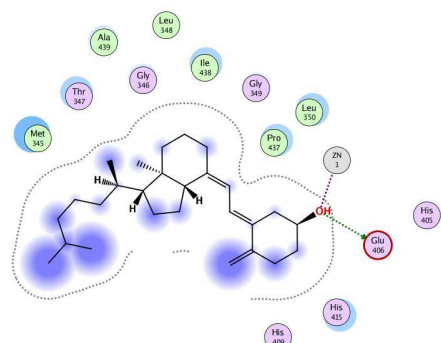

3edz

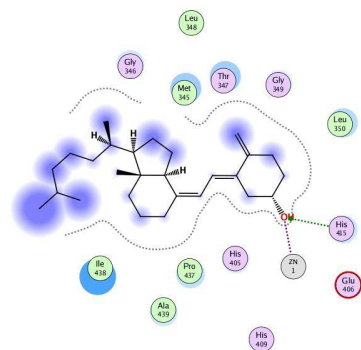

3lgp

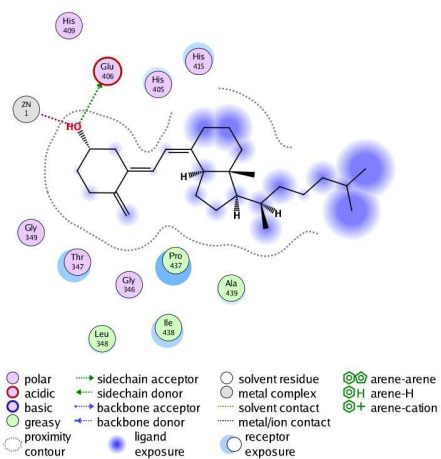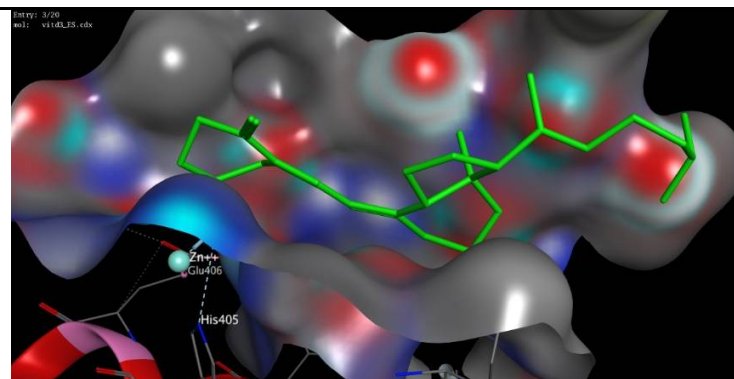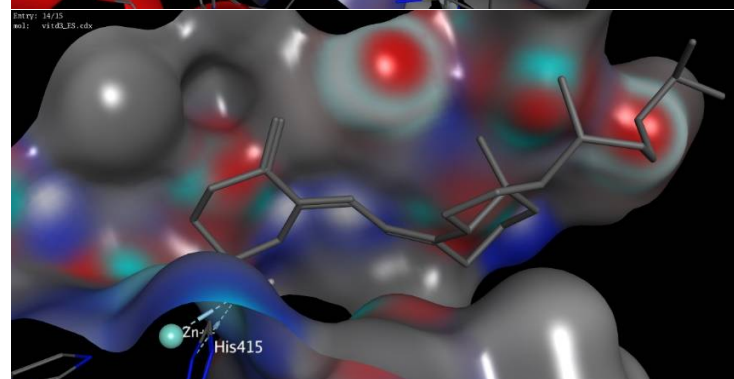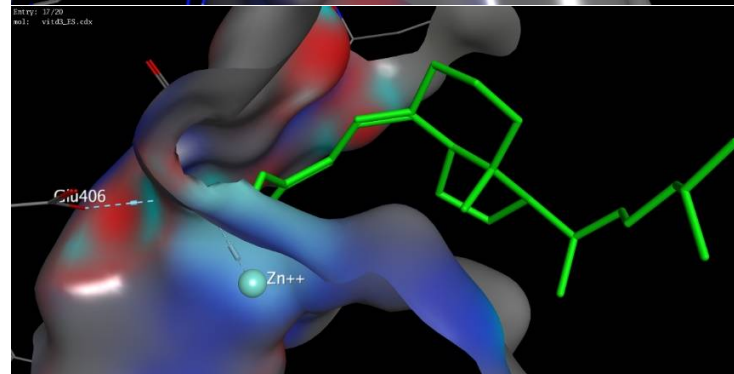

1bkc

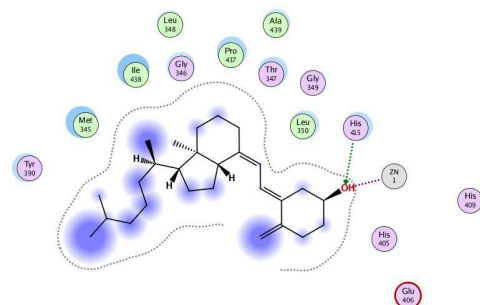

2oi0

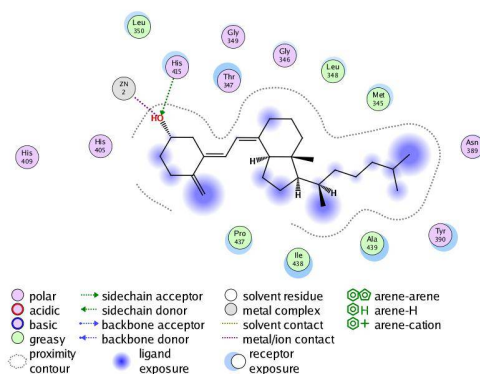

3lea

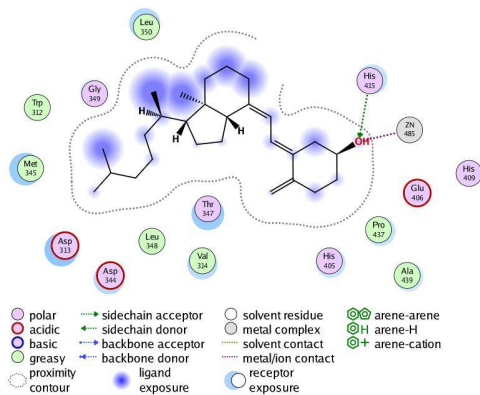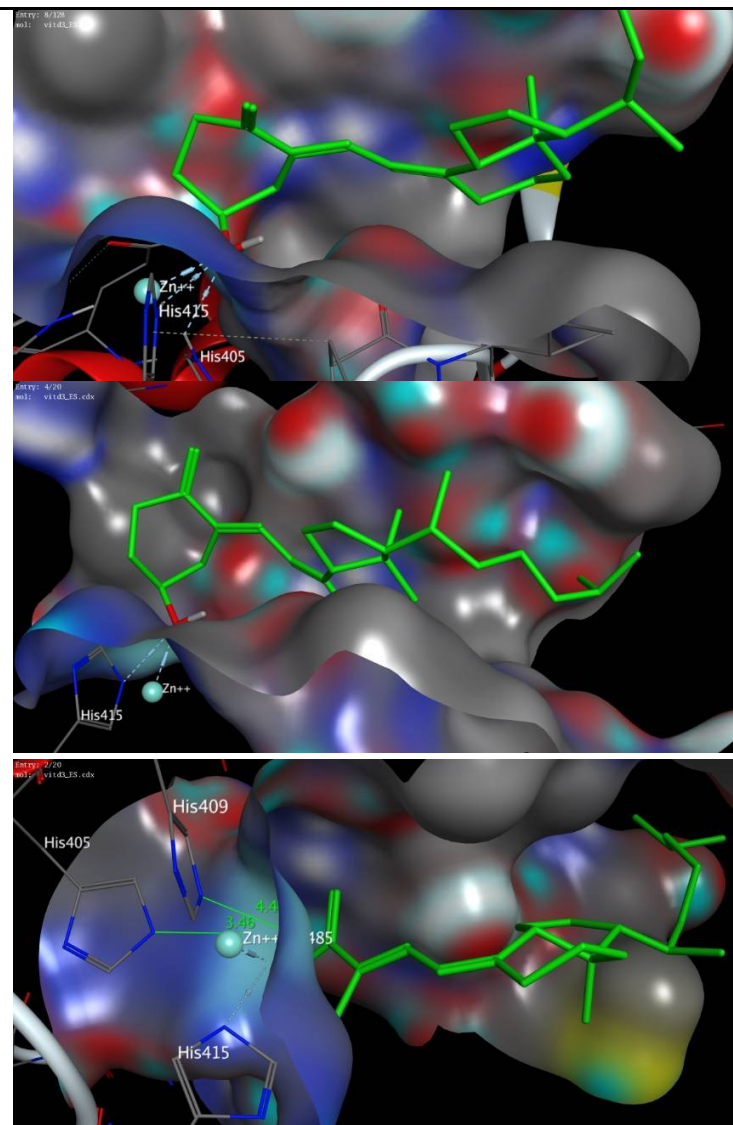

2fv9

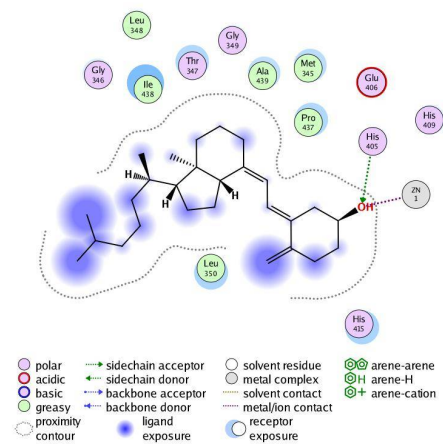

2fv5

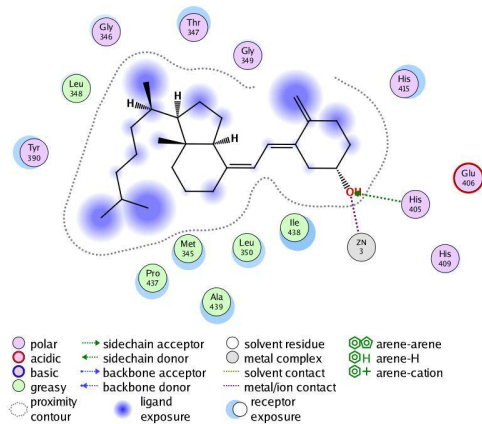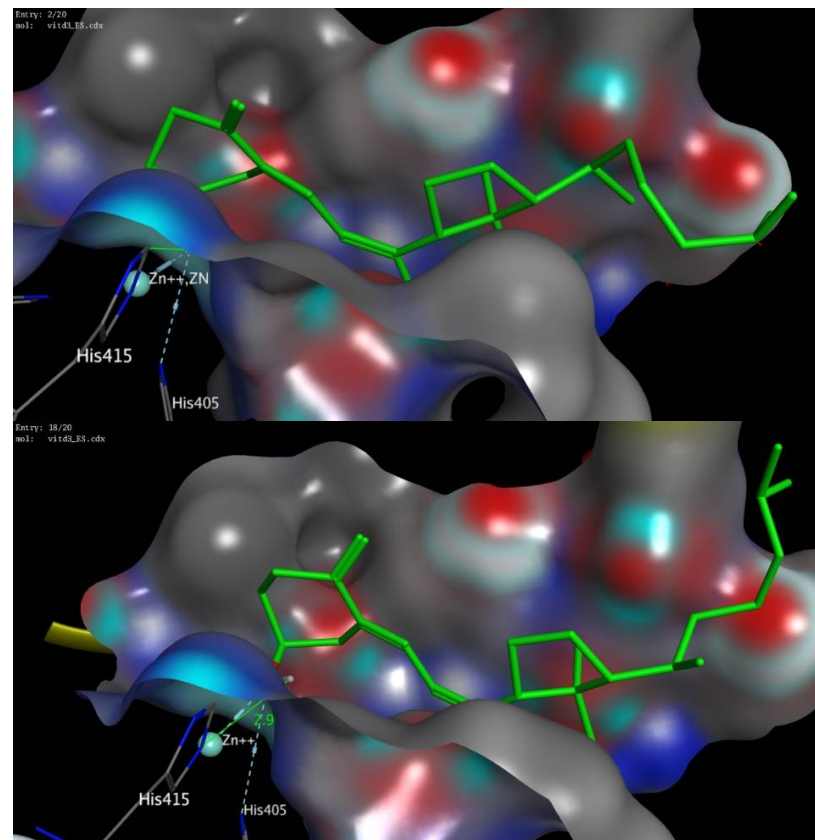

3g42

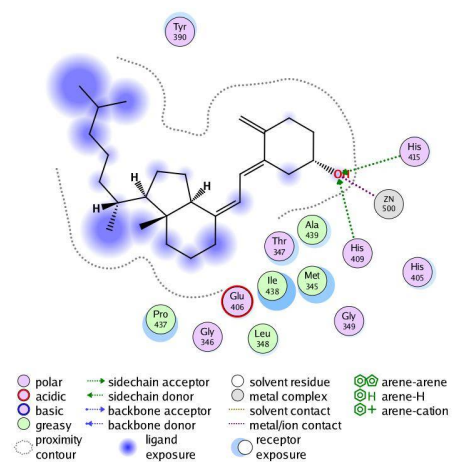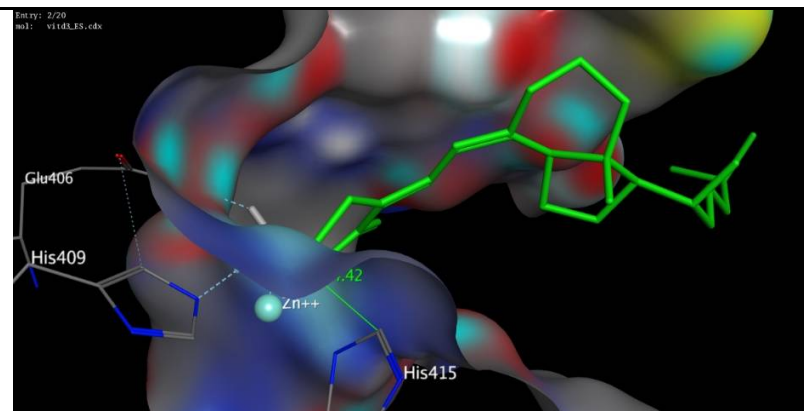

2a8h

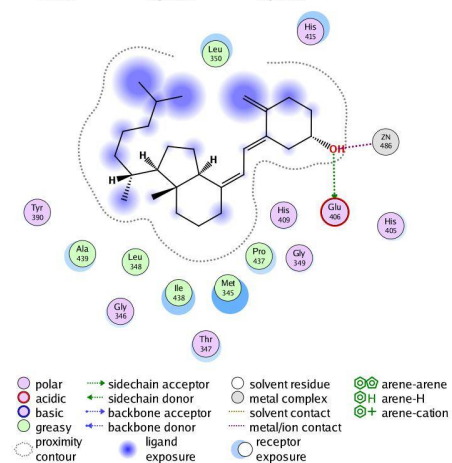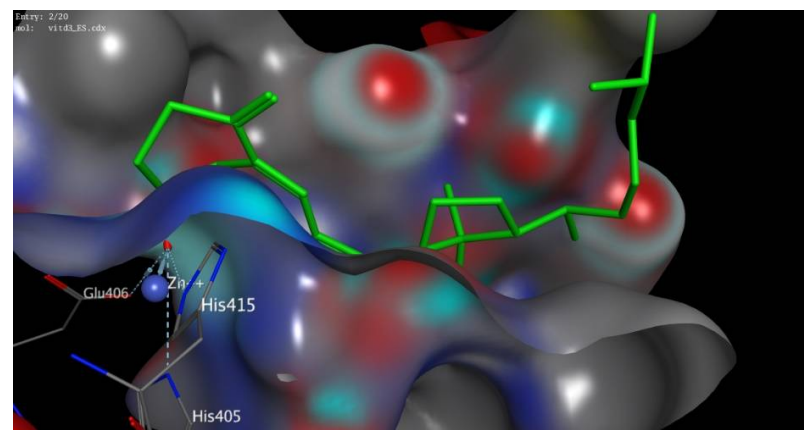

Supplement: s1 [file s1]
